## Reversal of New-Onset Diabetes through Modulating Inflammation and Stimulating $\beta$ -Cell Replication in Nonobese Diabetic Mice by a Dipeptidyl Peptidase IV Inhibitor

Lei Tian, Jie Gao, Jianqiang Hao, Yu Zhang, Huimin Yi, Timothy D. O'Brien, Robert Sorenson, Jian Luo, and Zhiguan Guo

Schulze Diabetes Institute and Department of Surgery (L.T., J.G., J.H., Y.Z., H.Y., Z.G.) and Departments of Veterinary Population Medicine (T.D.O.) and Genetics, Cell Biology, and Development (R.S.), University of Minnesota, Minneapolis, Minnesota 55455; Department of Surgery (L.T.), the First Affiliated Hospital of Guangxi Medical University, Nanning 530021, China; Department of Hepatobiliary Surgery (J.G.), People's Hospital, Peking University, Beijing 100083, China; Department of Surgery (H.Y.), Third Affiliated Hospital of Sun Yat-sen University, 510275 Guangzhou, China; and Amgen, Inc. (J.L.), South San Francisco, California 94080

Inhibition of dipeptidyl peptidase IV (DPP-IV) activity by NVP-DPP728, a DPP-IV inhibitor, improves the therapeutic efficacy of glucagon-like peptide-1 (GLP-1). CD26 is a membrane-associated glycoprotein with DPP-IV activity and is expressed on lymphocytes. We investigated the effect of NVP-DPP728 on reversing new-onset diabetes in nonobese diabetic (NOD) mice and modulating the inflammatory response and stimulating  $\beta$ -cell regeneration. New-onset diabetic NOD mice were treated with NVP-DPP728 for 2, 4, and 6 wk. Blood glucose level was monitored. Regulatory T cells in thymus and secondary lymph nodes, TGF- $\beta$ 1 and GLP-1 in plasma, and the insulin content in the pancreas were measured. Immunostaining for insulin and bromodeoxyuridine (BrdU) were performed. The correlation of  $\beta$ -cell replication with inflammation was determined. In NVP-DPP728-treated NOD mice, diabetes could be reversed in 57, 74, and 73% of mice after 2, 4, and 6 wk treatment, respectively. Insulinitis was reduced and the percentage of CD4<sup>+</sup>CD25<sup>+</sup>FoxP3<sup>+</sup> regulatory T cells was increased in treated NOD mice with remission. Plasma TGF- $\beta$ 1 and GLP-1, the insulin content, and both insulin<sup>+</sup> and BrdU<sup>+</sup>  $\beta$ -cells in pancreas were also significantly increased. No significant correlations were found between numbers of both insulin<sup>+</sup> and BrdU<sup>+</sup>  $\beta$ -cells in islets and  $\beta$ -cell area or islets with different insulinitis score in NOD mice with remission of diabetes. In conclusion, NVP-DPP728 treatment can reverse new-onset diabetes in NOD mice by reducing insulinitis, increasing CD4<sup>+</sup>CD25<sup>+</sup>FoxP3<sup>+</sup> regulatory T cells, and stimulating  $\beta$ -cell replication.  $\beta$ -Cell replication is not associated with the degree of inflammation in NVP-DPP728-treated NOD mice. (*Endocrinology* 151: 3049–3060, 2010)

Development of type 1 diabetes is due to an imbalance between  $\beta$ -cell regeneration and  $\beta$ -cell destruction. Therefore, preventing  $\beta$ -cell destruction and promoting  $\beta$ -cell regeneration would have a significant therapeutic impact. At the clinical onset of type 1 diabetes, human patients still have a certain percentage of their  $\beta$ -cell mass remaining. If autoimmunity against  $\beta$  cells were controlled in these patients, diabetes could be

reversed by increasing the  $\beta$ -cell mass sufficiently to restore normoglycemia.

Glucagon-like peptide (GLP)-1 and glucose-dependent insulintropic polypeptide (GIP) are two potent glucose-dependent insulintropic peptide hormones that stimulate insulin secretion, promote  $\beta$ -cell regeneration, and prevent  $\beta$ -cell apoptosis (1). Our earlier study showed that exendin-4, a GLP-1 analog, can enhance the reversal of diabetes

ISSN Print 0013-7227 ISSN Online 1945-7170

Printed in U.S.A.

Copyright © 2010 by The Endocrine Society

doi: 10.1210/en.2010-0068 Received January 19, 2010. Accepted April 13, 2010.

First Published Online May 5, 2010

Abbreviations: BrdU, Bromodeoxyuridine; DPP-IV, inhibition of dipeptidyl peptidase IV; GIP, glucose-dependent insulintropic polypeptide; GLP, glucagon-like peptide; NOD, nonobese diabetic.

For editorial see page 2971

through stimulating  $\beta$ -cell replication in nonobese diabetic (NOD) mice after restoring self-tolerance (2). However, GLP-1 and GIP have extremely short half-lives after secretion because of rapid degradation by dipeptidyl peptidase IV (DPP-IV). DPP-IV is a serine-type protease that cleaves N-terminal dipeptides from polypeptides containing proline or alanine as the penultimate amino acid. Inhibition of DPP-IV activity could potentially improve the therapeutic effectiveness of GLP-1 and GIP (3).

CD26 is a membrane-associated peptidase with DPP-IV activity in its extracellular domain and is expressed in lymphocytes (4, 5). It contributes to the regulation of development, maturation, and migration of T cells, cytokine production, and T cell-dependent antibody production (6). Inhibition of surface DPP-IV not only suppresses T cell proliferation and Th1 cytokine productions but also stimulates TGF- $\beta$ 1 secretion (7, 8). DPP-IV inhibitor treatment prevents and ameliorates experimental allergic encephalomyelitis in mice through up-regulating TGF- $\beta$ 1 (9).

Using CD26-deficient mice, a recent study showed that TGF- $\beta$ 1-mediated control of inflammation and autoimmunity through CD26/DPP-IV (10). TGF- $\beta$ 1 plays a critical role in ameliorating autoimmune diabetes (11–13). It protects against diabetes via regulation of expansion of Foxp3-expressing CD4<sup>+</sup>CD25<sup>+</sup> regulatory T cells (14). TGF- $\beta$  signaling is also required for the function of regulatory T cells (12, 15). Regulatory T cells are indispensable for maintaining self-tolerance and preventing autoimmune diseases (16). Thus, targeting CD26/DPP-IV may have beneficial effects in human patients with type 1 diabetes by stimulating  $\beta$ -cell replication through potentiation of the incretin response and ameliorating the autoimmune response.

NVP-DPP728 is an orally active and selective DPP-IV inhibitor that inhibits degradation of GLP-1 (17, 18) and improves glucose tolerance and preserves islet function (19). Its effect is directly due to the inhibition of plasma DPP-IV activity (20–22). In this study, we investigated the effects of NVP-DPP728 in NOD mice on reversing diabetes, modulating inflammation, and stimulating  $\beta$ -cell regeneration. Although it has been shown that DPP-IV-inhibitor treatment stimulates TGF- $\beta$ 1 secretion, whether DPP-IV inhibitors up-regulate CD4<sup>+</sup>CD25<sup>+</sup>FoxP3<sup>+</sup> regulatory T cells has not been previously addressed. We therefore also investigated the effects of NVP-DPP728 treatment on increasing CD4<sup>+</sup>CD25<sup>+</sup>FoxP3<sup>+</sup> regulatory T cells in diabetic NOD mice.

## Materials and Methods

### Mice

Female NOD/Lt mice (H-2<sup>g7</sup>) and male NOD.scid mice were purchased from The Jackson Laboratory (Bar Harbor, ME).

These mice were housed in pathogen-free animal facilities at the University of Minnesota. The animal use protocol was approved by the Institutional Animal Care and Use Committee at our university. Spontaneous diabetes in NOD mice was monitored after the age of 12 wk, using a Glucometer Elite blood glucose monitor (Bayer, Tarrytown, NY). New-onset diabetes was diagnosed when the nonfasting blood glucose level was greater than 250 mg/dl on at least two consecutive measurements. Remission was defined as the blood glucose levels consistently remaining at less than 200 mg/dl.

### Treatment

NVP-DPP728 was obtained from IQsynthesis (St. Louis, MO). New-onset diabetic NOD mice, which had the nonfasting blood glucose level greater than 250 mg/dl on at least two consecutive measurements, were given 30 mg/kg NVP-DPP728 orally, twice daily, for 2, 4, or 6 wk. All diabetic mice also received insulin at 1 U/d. Insulin treatment was stopped if the blood glucose level was less than 200 mg/kg.

### Flow cytometric analysis

NOD mice, with or without NVP-DPP728 treatment, were randomly selected to detect CD4<sup>+</sup>CD25<sup>+</sup>FoxP3<sup>+</sup> regulatory T cells. Single-cell suspensions were prepared and incubated with 1  $\mu$ g anti-CD4, anti-CD25, and anti-FoxP3 conjugated with fluorescein isothiocyanate, phycoerythrin, or allophycocyanin (BD PharMingen, San Diego, CA) and then washed in PBS-2% fetal calf serum. Stained cells were analyzed on a FACScan flow cytometer (Becton Dickinson, Mountain View, CA).

### In vivo adoptive transfer

Spleens were harvested from NVP-DPP728-treated diabetic NOD mice with remission. Lymphocytes were isolated from the spleen and were resuspended in PBS at  $1 \times 10^7$ /ml. A total of 0.5 ml of lymphocytes was injected in the tail vein of each NOD.scid mouse. Lymphocytes from the spleen of diabetic NOD mouse also were obtained and were injected into each NOD.scid mouse as a control group. The onset of diabetes was monitored by measuring the blood glucose.

### Insulin content

Pancreases were collected and minced in acidified ethanol (75% ethanol, 0.1 N HCl) until tissues became homogenates. Samples were incubated for 24 h at 4 C to extract insulin from the tissue. The extracts were centrifuged and the supernatant was resuspended in 1 ml H<sub>2</sub>O and serially diluted in buffer of 10 mM Tris (pH 7.4) and 1 mM EDTA. Insulin was measured using insulin ELISA kits for mouse insulin (Mercodia, Uppsala, Sweden).

### Plasma TGF- $\beta$ 1 assay

Blood samples were obtained by cardiac puncture. Plasma samples were stored at  $-20^\circ\text{C}$  until analyzed. Plasma TGF- $\beta$ 1 were measured using a mouse TGF- $\beta$ 1 ELISA kit (R&D Systems Inc., Minneapolis, MN).

### Plasma active (7-36 amide) GLP-1 assay

Diabetic NOD mice were treated with 30 mg/kg NVP-DPP728. Blood samples were collected after half-hour treatment, and after 12–16 h treatment. Plasma active GLP-1 was measured by using active GLP-1 ELISA kit (Millipore, Billerica,

MA) that is specifically for the GLP-1(7-36) amide form, the majority of circulating biologically active GLP-1.

## Pathology

Pancreases of NOD mice, with or without NVP-DPP728 treatment, were harvested and fixed with 4% paraformaldehyde and embedded in paraffin. The pancreas sections were stained with hematoxylin and eosin for histological scoring of insulinitis. Insulinitis scoring was done by the pathologist (T.D.O.) who was blinded as to treatment group. The level of leukocyte infiltration in the islets was scored as follows: 1) well-preserved and completely intact islet without leukocyte infiltrate, 2) well-preserved islet with periislet infiltrate or few leukocytes intraislet, 3) islet partially disrupted by leukocyte infiltrate, and 4) islet extensively disrupted and destroyed with only single endocrine cells discernible in the infiltrate.

## Immunofluorescence

To label replicated  $\beta$ -cells, we injected bromodeoxyuridine (BrdU; 100 mg/kg  $\cdot$  d, Sigma-Aldrich, St. Louis, MO) into NOD mice for 4 wk, starting from the day of NVP-DPP728 treatment. Double-immunofluorescence staining for insulin and BrdU was done on formalin-fixed and paraffin-embedded pancreatic sections. For insulin labeling, sections were first deparaffinized, rehydrated, and incubated with guinea pig antiserum insulin (Dako

A/S, Glostrup, Denmark). Next, sections were incubated with fluorescein isothiocyanate-conjugated, goat anti-guinea pig Ig. For BrdU labeling, sections were incubated with biotinylated anti-BrdU (BrdU kit; BD Biosciences, San Jose, CA). Sections were then incubated with streptavidin-AlexaFluor-594. Finally, nuclear staining was done using TOPRO-3 (Molecular Probes, Eugene, OR). All BrdU<sup>+</sup> and BrdU<sup>-</sup> nuclei in insulin<sup>+</sup>  $\beta$  cells were counted. The percentage of replicated  $\beta$ -cells was calculated as the mean  $\pm$  SD of insulin<sup>+</sup> and BrdU<sup>+</sup>  $\beta$ -cells over the total of insulin<sup>+</sup>  $\beta$ -cells in islets.

## Statistics

The significance of differences between groups was determined by the Kaplan-Meier analysis, one-way ANOVA, and a Student's *t* test. Data were shown as mean  $\pm$  SD. A value of *P* < 0.05 was considered statistically significant.

## Results

### NVP-DPP728 treatment reversed new-onset diabetes in NOD mice

Remission of diabetes was not achieved in the insulin therapy-only group. All NOD mice in the control group

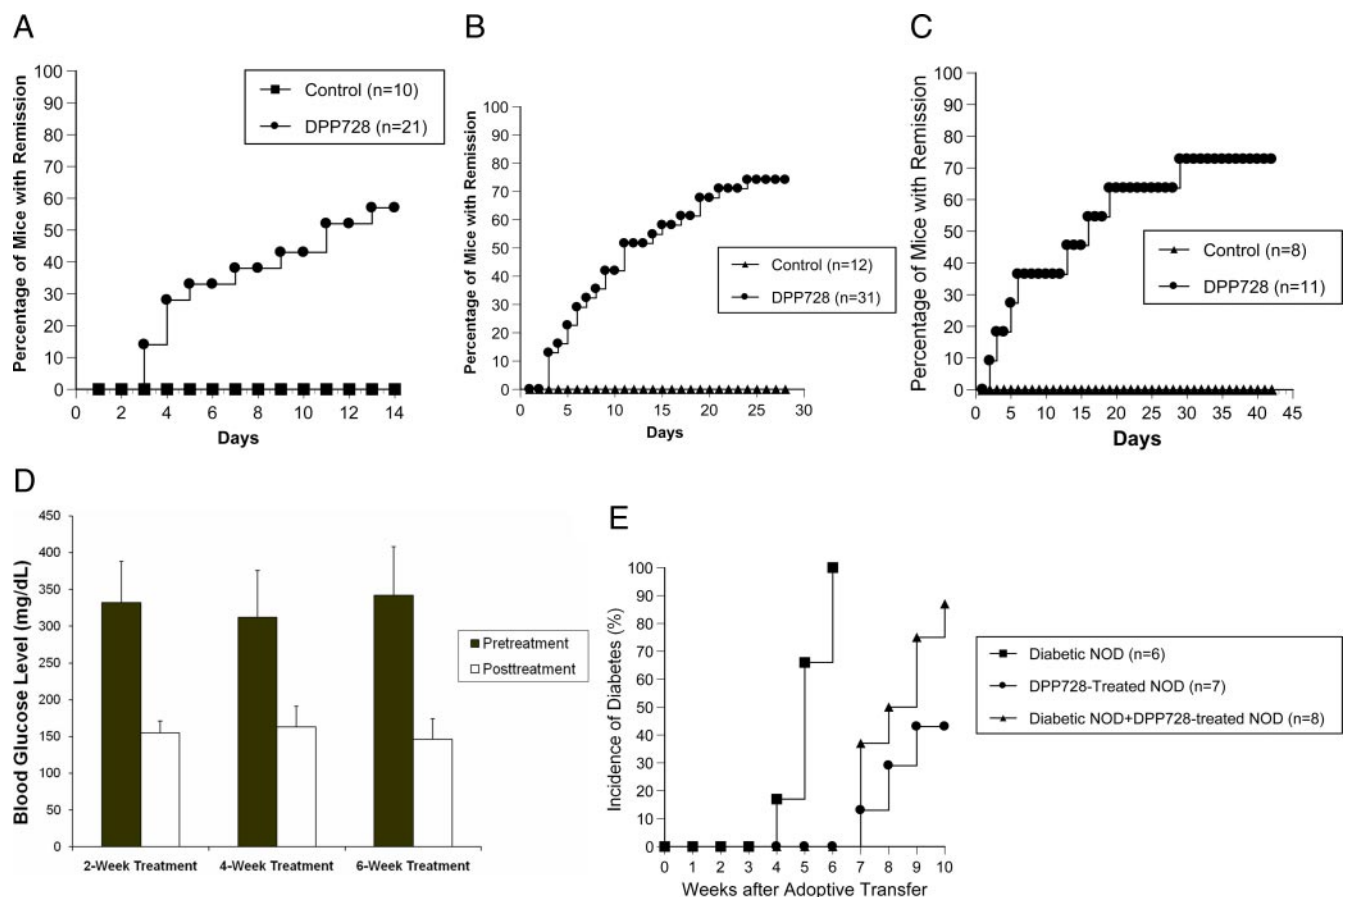

**FIG. 1.** NVP-DPP728 treatment reversed new-onset diabetes in NOD mice. **A**, Incidence of remission in 2-wk-treated NOD mice. **B**, Incidence of remission in 4-wk-treated NOD mice. **C**, Incidence of remission in 6-wk-treated NOD mice. **D**, Blood glucose levels in treated diabetic NOD mice with remission before and after 2, 4, and 6 wk treatment. **E**, Incidence of diabetes in NOD.scid mice after adoptive transfer of lymphocytes from control diabetic NOD mice, from NVP-DPP728-treated NOD mice with remission, and after coadoptive transfer of lymphocytes from control diabetic NOD mice with lymphocytes from NVP-DPP728-treated NOD mice with remission.

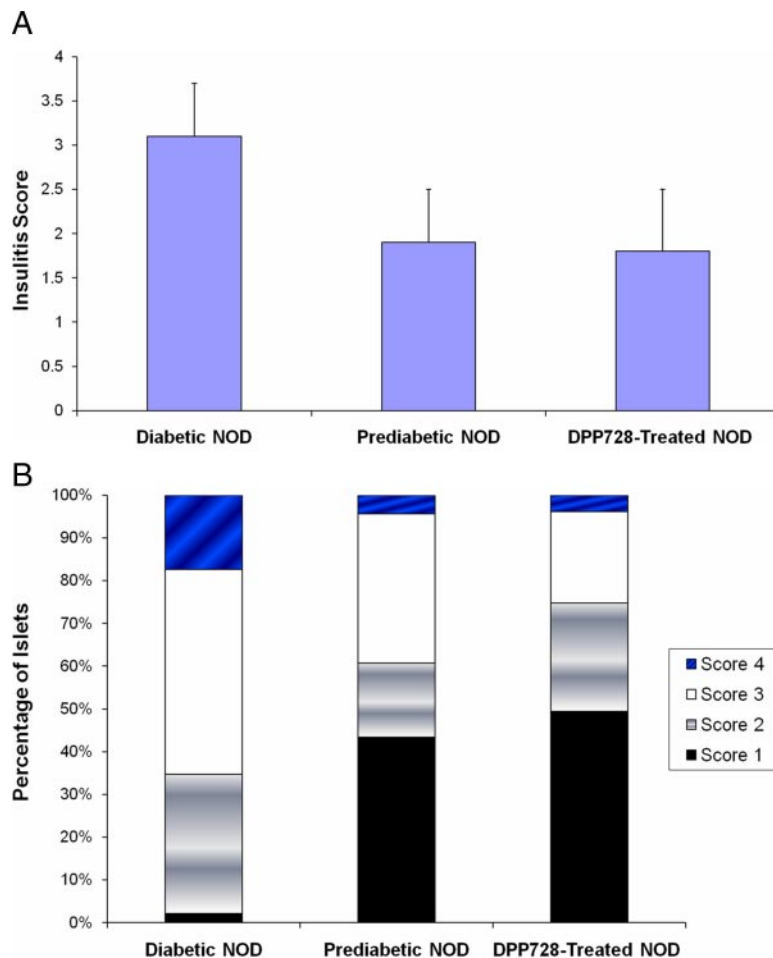

**FIG. 2.** A, Insulinitis score in control diabetic NOD mice, prediabetic NOD mice, and 4-wk NVP-DPP728-treated NOD mice. B, Percentage of islets in the pancreas of diabetic, control NOD mice, prediabetic NOD mice, and 4-wk NVP-DPP728-treated NOD with different insulinitis scores.

became progressively more hyperglycemic. However, in the group treated with NVP-DPP728 for 2 wk, 11 of 20 (57%) diabetic NOD mice became normoglycemic at 2 wk (Fig. 1A;  $P < 0.01$ ). The mean blood glucose level of these 11 diabetic NOD mice at the time of initiation of treatment was  $332 \pm 56$  mg/dl but decreased to  $155 \pm 16$  mg/dl at 2 wk ( $P < 0.01$ ). To determine whether short-term NVP-DPP728 treatment could induce long-term remission, we continued to monitor blood glucose in these 11 mice with remission after discontinuing NVP-DPP728 treatment. The mean blood glucose level among these mice increased to  $341 \pm 211$  mg/dl, and only two of 11 mice remained normoglycemia at 6 wk after treatment. Thus, our data showed that NVP-DPP728 treatment reversed new-onset diabetes in NOD mice. However, long-term remission could not be induced in most NOD mice by 2 wk treatment.

To determine whether the rate of remission could be further increased, we extended our treatment to 4 and 6 wk. Diabetic NOD mice in the control groups became progressively more hyperglycemic. They either died spon-

taneously or were euthanized due to significant debilitation. In contrast, 23 of 31 diabetic NOD mice treated with NVP-DPP728 for 4 wk (74%) became normoglycemic at 4 wk (Fig. 1B;  $P < 0.01$ ); and eight of 11 (73%) mice treated with NVP-DPP728 for 6 wk became normoglycemic at 6 wk after initiation of treatment (Fig. 1C;  $P < 0.01$ ). The blood glucose levels of 23 NOD mice with remission after 4 wk treatment and eight NOD mice with remission after 6 wk treatment were significantly decreased, compared with the levels at the time of initiation of treatment (Fig. 1D).

To determine whether long-term remission was induced after extended 6 wk treatment, we randomly monitored four mice after stopping treatment. Hyperglycemia returned between 7 and 42 d ( $28 \pm 15$  d) after treatment. Thus, extended NVP-DPP728 treatment could increase the rate of reversal of new-onset diabetes in NOD mice. However, diabetes gradually returned after stopping treatment.

Significant decrease of body weight was not found in eight mice with remission after 6 wk treatment. The mean body weight was  $23.8 \pm 1.6$  g before treatment and  $22.3 \pm 2.0$  g after treatment.

### Immunoregulation mediated reversing new-onset diabetes in NVP-DPP728-treated NOD mice

To determine whether immunoregulation plays a role in NVP-DPP728-treated NOD mice with remission, we adoptively transferred lymphocytes from NVP-DPP728-treated NOD mice with remission. Lymphocytes from NVP-DPP728-treated NOD mice could transfer diabetes to some NOD.scid mice. All six NOD.scid mice that received lymphocytes from diabetic NOD mice developed diabetes at 6 wk after adoptive transfer (Fig. 1E). However, the development of diabetes was significantly delayed compared with induction of diabetes by the transfer of lymphocytes from control diabetic NOD mice. Diabetes did not develop at 6 wk ( $n = 7$ ;  $P < 0.05$ ), and in only three of seven NOD.scid mice at 10 wk, after receiving the same amount of lymphocytes from NVP-DPP728-treated NOD mice. The onset of diabetes in NOD.scid mice was also significantly delayed after cotransfer of lymphocytes from diabetic NOD mice with lymphocytes from NVP-DPP728-treated NOD mice. Diabetes did not develop in



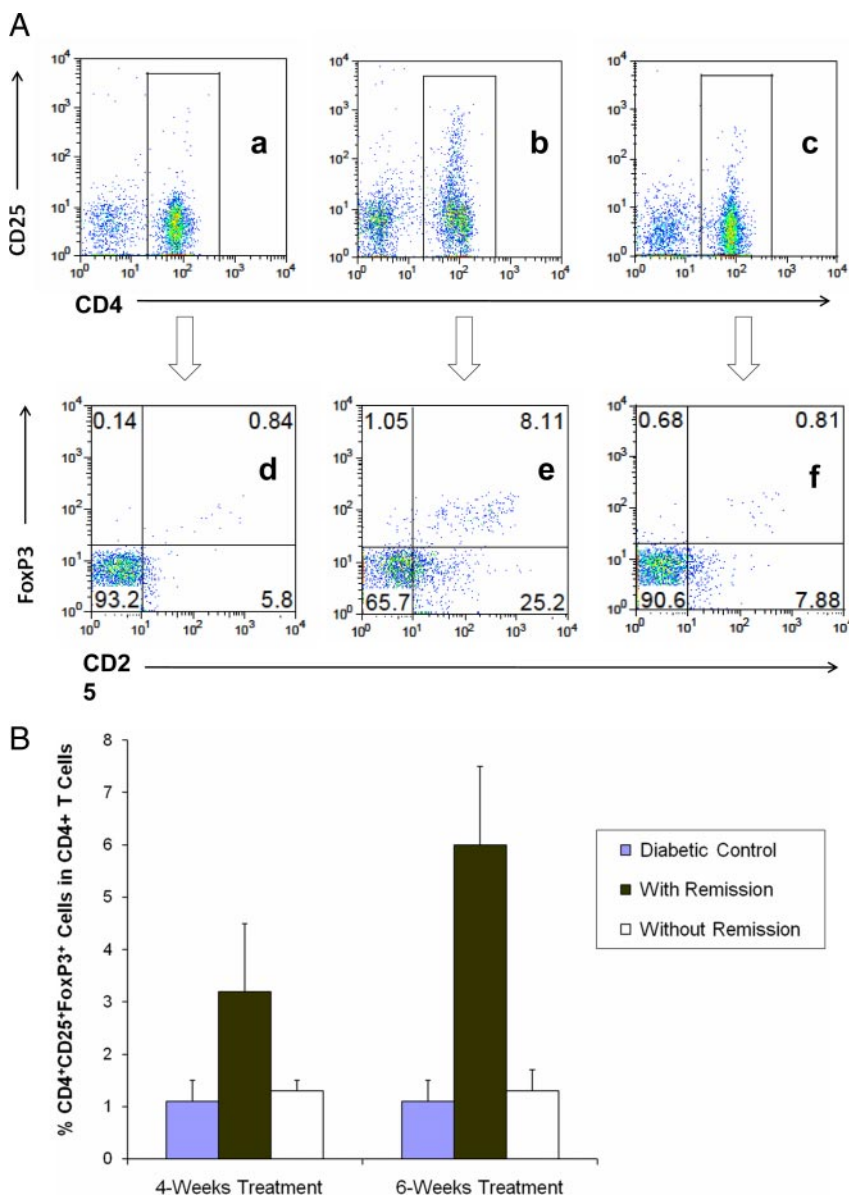

**FIG. 3.** NVP-DPP728 treatment increased CD4<sup>+</sup>CD25<sup>+</sup>FoxP3<sup>+</sup> regulatory T cells in thymus of diabetic NOD mice with remission. A, CD4<sup>+</sup>CD25<sup>+</sup> T cells in thymus of control diabetic NOD mouse (a), 6-wk-treated NOD mouse with remission (b), and treated NOD mouse with relapse after stopping treatment (c); CD25<sup>+</sup>FoxP3<sup>+</sup> cells in the total CD4<sup>+</sup> T cells in the thymus of control diabetic NOD mouse (d), 6-wk-treated NOD mouse with remission (e), and treated NOD mouse with relapse after stopping treatment (f). B, Percentage of CD4<sup>+</sup>CD25<sup>+</sup>FoxP3<sup>+</sup> regulatory T cells in the total CD4<sup>+</sup> T cells in the thymus of control diabetic NOD mice and 4- and 6-wk-treated NOD mice, with and without remission.

NOD.scid mice at 6 wk ( $n = 8$ ;  $P < 0.05$ ), after cotransfer of  $1 \times 10^7$  lymphocytes from diabetic NOD mice with  $5 \times 10^6$  lymphocytes from NVP-DPP728-treated NOD mice. However, diabetes did develop in seven of eight NOD.scid mice at 10 wk.

### NVP-DPP728 treatment reduced insulinitis in diabetic NOD mice

To determine whether insulinitis was reduced by NVP-DPP728 treatment in these mice with remission, we evaluated the degree of insulinitis in the pancreas of 12 NVP-

DPP728-treated NOD mice. The mean insulinitis score was significantly lower in prediabetic NOD mice and diabetic NOD mice treated with NVP-DPP728 for 4 wk than in diabetic NOD mice (Fig. 2A). The mean insulinitis score was  $1.9 \pm 0.6$  in prediabetic NOD mice,  $3.1 \pm 0.6$  in diabetic NOD mice, and  $1.8 \pm 0.7$  in diabetic NOD mice treated with NVP-DPP728 for 4 wk ( $n = 12$  vs. diabetic NOD mice,  $P < 0.01$ ). Mice treated with NVP-DPP728 had the highest percentage of intact islet, with a score of 1 (Fig. 2B).

### NVP-DPP728 treatment increased CD4<sup>+</sup>CD25<sup>+</sup>FoxP3<sup>+</sup> regulatory T cells in diabetic NOD mice with remission

Because naturally occurring CD4<sup>+</sup>CD25<sup>+</sup>FoxP3<sup>+</sup> T cells develop in the thymus as a normal process of T cell ontogenesis, we measured the percentage of CD4<sup>+</sup>CD25<sup>+</sup>FoxP3<sup>+</sup> regulatory T cells in total CD4<sup>+</sup> T cells in the thymus of diabetic NOD mice treated with NVP-DPP728 for 4 and 6 wk. The percentage of CD4<sup>+</sup>CD25<sup>+</sup>FoxP3<sup>+</sup> regulatory T cells in total CD4<sup>+</sup> T cells in the thymus of treated NOD mice with remission significantly increased after 4 and 6 wk treatment, compared with untreated control NOD mice and treated NOD mice without remission (Fig. 3, A and B). After 4 wk of treatment, the mean percentage of CD4<sup>+</sup>CD25<sup>+</sup>FoxP3<sup>+</sup> regulatory T cells in total CD4<sup>+</sup> T cells in the thymus was  $1.1 \pm 0.4\%$  in control diabetic NOD mice without treatment ( $n = 9$ ),  $1.3 \pm 0.2\%$  in diabetic NOD mice without remission ( $n = 4$ ), and  $3.2 \pm 1.3\%$  in diabetic NOD mice with remission ( $n = 12$ ;  $P < 0.01$ ).

Extending treatment for 6 wk significantly increased CD4<sup>+</sup>CD25<sup>+</sup>FoxP3<sup>+</sup> regulatory T cells in the thymus of diabetic NOD mice with remission (Fig. 3B,  $P < 0.01$ ). After 6 wk of treatment, the mean percentage of CD4<sup>+</sup>CD25<sup>+</sup>FoxP3<sup>+</sup> regulatory T cells in total CD4<sup>+</sup> T cells in the thymus  $6.0 \pm 1.5\%$  in diabetic NOD mice with remission ( $n = 4$  vs. 4 wk treatment;  $P < 0.01$ ), and  $1.3 \pm 0.4\%$  in diabetic NOD mice without remission ( $n = 3$ ;  $P > 0.05$ ). However, a significant decrease was observed in

NOD mice with a relapse after stopping treatment (*vs.* 6 wk treatment,  $P < 0.01$ ). There was no significant change of CD4<sup>+</sup> T cells in the thymus (data not shown). Thus, NVP-DPP728 treatment could increase the induction of naturally occurring regulatory T cells in the thymus, and continuing treatment is required for maintaining the increase. Relapse in mice with remission was associated with the decrease of naturally occurring regulatory T cells in the thymus.

The percentage of CD4<sup>+</sup>CD25<sup>+</sup>FoxP3<sup>+</sup> regulatory T cells in total CD4<sup>+</sup> T cells in the pancreatic lymph nodes also was significantly increased after 4 wk treatment (Fig. 4A). The mean percentage of CD4<sup>+</sup>CD25<sup>+</sup>FoxP3<sup>+</sup> regulatory T cells in total CD4<sup>+</sup> T cells in the pancreatic lymph nodes was  $6.1 \pm 1.6\%$  in control diabetic NOD

mice without treatment ( $n = 9$ ) and  $10.2 \pm 2.5\%$  in diabetic NOD mice with remission after 4 wk treatment ( $n = 12$ ;  $P < 0.05$ ). However, no significant increase of these cells was found in neck lymph nodes, spleen, and peripheral blood after 4 wk treatment ( $P > 0.05$ ).

When treatment was extended to 6 wk, we detected a significant increase in CD4<sup>+</sup>CD25<sup>+</sup>FoxP3<sup>+</sup> regulatory T cells, not only in the pancreatic lymph nodes but also in the neck lymph nodes and the spleen in NOD mice with remission (Fig. 4B). Although a significant increase was found in both pancreatic and neck lymph nodes, the level was significantly higher in the pancreatic lymph nodes than the neck lymph nodes ( $P < 0.01$ ). The percentage of CD4<sup>+</sup>CD25<sup>+</sup>FoxP3<sup>+</sup> regulatory T cells in total CD4<sup>+</sup> T cells was  $20.2 \pm 3.8\%$  in the pancreatic lymph nodes ( $n = 4$  *vs.* diabetes control;  $P < 0.01$ ),  $12.6 \pm 2.0\%$  in the neck lymph nodes ( $n = 4$  *vs.* diabetes control;  $P < 0.05$ ), and  $15.9 \pm 2.5\%$  in the spleen ( $n = 4$  *vs.* diabetes control;  $P < 0.01$ ). Our data indicate that more regulatory T cells in the draining lymph nodes of pancreas. However, the level of these cells significantly declined in pancreatic lymph nodes and spleen in NOD mice with normoglycemia but relapsed after stopping treatment, compared with mice with remission after 6 wk treatment. After stopping treatment, the level was  $10.2 \pm 1.8\%$  in pancreatic lymph nodes ( $P < 0.01$ ) and  $9.9 \pm 3.1\%$  in the spleen of NOD mice with normoglycemia but returned to hyperglycemia after stopping treatment ( $n = 4$  *vs.* with remission after 6 wk treatment;  $P < 0.01$ ).

Because regulatory T cells migrating to the inflammatory site is required for optimal control of inflammation (23), we also measured the CD4<sup>+</sup>CD25<sup>+</sup>FoxP3<sup>+</sup> regulatory T cells in total CD4<sup>+</sup> T cells in the pancreas of treated NOD mice. Although the percentage of CD4<sup>+</sup> T cells in total pancreas of 6 wk NVP-DPP728-treated NOD mice with remission was significantly lower than in control diabetic NOD mice (Fig. 5A,  $P < 0.05$ ), significant increases of CD4<sup>+</sup>CD25<sup>+</sup>FoxP3<sup>+</sup> regulatory T cells in total CD4<sup>+</sup> T cells were found in the pancreas of NVP-DPP728-treated NOD mice with remission, compared with the control diabetic NOD mice (Fig. 5B). However, percentage of these cells significantly declined in pancreases of NOD mice with normoglycemia but relapsed after stopping treatment, compared with the mice with remission after 6 wk treatment. The percentage of CD4<sup>+</sup>CD25<sup>+</sup>FoxP3<sup>+</sup> regulatory T cells in total CD4<sup>+</sup> T cells in pancreases was  $20.9 \pm 4.7\%$  in NVP-DPP728-treated NOD mice with remission ( $n = 4$ ),  $7.5 \pm 1.4\%$  in control diabetic NOD mice ( $n = 6$ ;  $P < 0.01$ ), and  $5.9 \pm 1.9\%$  in treated NOD mice with a relapse after stopping treatment ( $n = 4$ ;  $P < 0.01$ ).

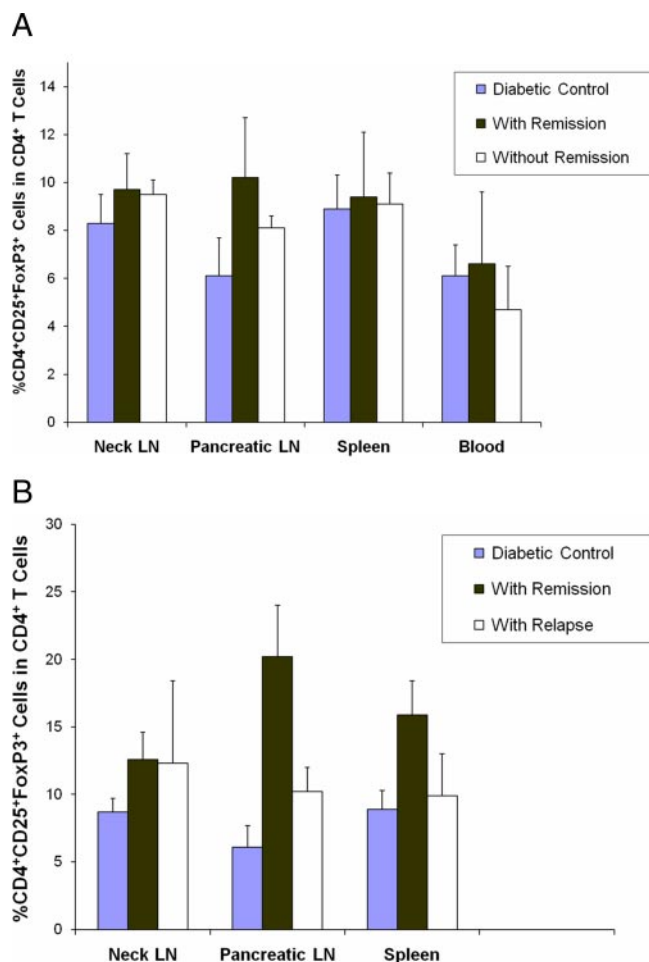

**FIG. 4.** NVP-DPP728 treatment increased CD4<sup>+</sup>CD25<sup>+</sup>FoxP3<sup>+</sup> regulatory T cells in secondary lymph organs of diabetic NOD mice with remission. **A**, Percentage of CD4<sup>+</sup>CD25<sup>+</sup>FoxP3<sup>+</sup> regulatory T cells in total CD4<sup>+</sup> T cells from the neck lymph nodes, pancreatic lymph nodes, spleen, and peripheral blood in control diabetic NOD mice and treated diabetic NOD mice with and without remission, after 4 wk of treatment. **B**, Percentage of CD4<sup>+</sup>CD25<sup>+</sup>FoxP3<sup>+</sup> regulatory T cells in total CD4<sup>+</sup> T cells from the neck lymph nodes, pancreatic lymph nodes, and spleen of control diabetic NOD mice, 6-wk-treated NOD mice with remission, and 6-wk-treated NOD mice with relapse after stopping treatment.

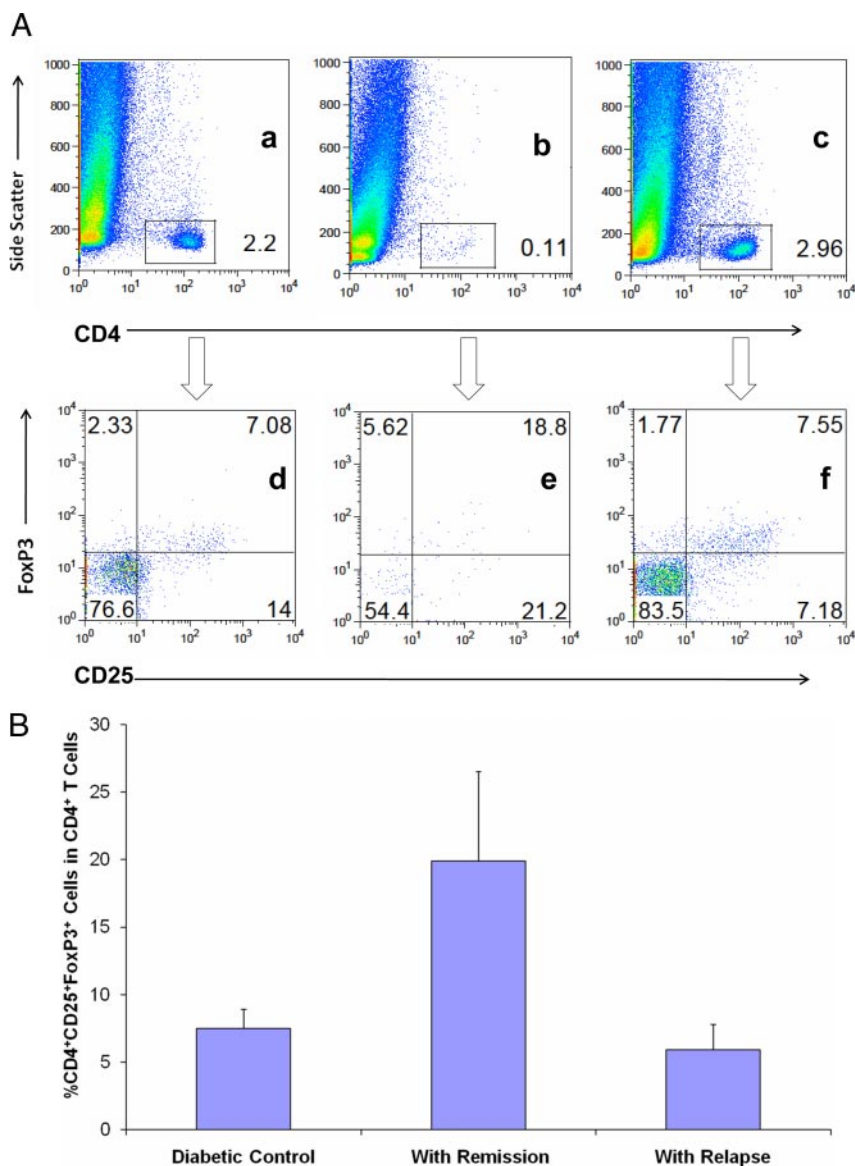

**FIG. 5.** NVP-DPP728 treatment increased CD4<sup>+</sup>CD25<sup>+</sup>FoxP3<sup>+</sup> regulatory T cells in the pancreas of diabetic NOD mice with remission. **A**, CD4<sup>+</sup> T cells in the pancreas of control diabetic NOD mouse (a), 6-wk-treated NOD mouse with remission (b), and treated NOD mouse with relapse after stopping treatment (c); CD25<sup>+</sup>FoxP3<sup>+</sup> cells in the total CD4<sup>+</sup> T cells in the pancreas of control diabetic NOD mouse (d), 6-wk-treated NOD mouse with remission (e), and treated NOD mouse with relapse after stopping treatment (f). **B**, Percentage of CD4<sup>+</sup>CD25<sup>+</sup>FoxP3<sup>+</sup> regulatory T cells in total CD4<sup>+</sup> T cells from the pancreas of control diabetic NOD mice, 6-wk-treated NOD mice with remission, and treated NOD mice with relapse after stopping treatment.

### NVP-DPP728 treatment increased TGF- $\beta$ 1 production in the plasma of NOD mice with remission

Because inhibition of surface DPP-IV stimulates TGF- $\beta$  secretion (7, 8), we determined plasma TGF- $\beta$ 1 levels in NVP-DPP728-treated NOD mice. After 4 wk treatment, the plasma TGF- $\beta$ 1 levels in NVP-DPP728-treated NOD mice with remission were significantly increased compared with control mice (Fig. 6A). However, a significant increase was not found in NVP-DPP728-treated NOD mice without remission. TGF- $\beta$ 1 plasma level was  $8.1 \pm$

1.2 ng/ml in untreated diabetic NOD mice ( $n = 6$ ),  $21.0 \pm 10.6$  ng/ml in NVP-DPP728-treated NOD mice with remission ( $n = 8$  vs. control diabetic mice;  $P < 0.05$ ), and  $10.2 \pm 2.3$  ng/ml in NVP-DPP728-treated NOD mice without remission ( $n = 5$ ,  $P > 0.05$ ).

### NVP-DPP728 treatment increased insulin content in diabetic NOD mice with remission

We measured the insulin content in whole pancreases of 4 wk NVP-DPP728-treated diabetic NOD mice with remission, in prediabetic NOD mice, diabetic NOD mice, and NOD.scid mice. The insulin content in NOD mice treated with NVP-DPP728 was significantly increased, as compared with the control diabetic NOD mice (Fig. 6B). Insulin content was significantly higher in NVP-DPP728-treated NOD mice and prediabetic NOD mice than diabetic NOD mice ( $P < 0.01$ ). However, the insulin content of control NOD.scid mice was significantly higher than in the prediabetic NOD mice and NVP-DPP728-treated NOD mice with normoglycemia ( $P < 0.01$ ).

### NVP-DPP728 treatment increased plasma active GLP-1 levels in diabetic NOD mice

To determine whether NVP-DPP728 treatment increases the plasma active GLP-1 levels, we measured the plasma active GLP-1 concentrations in NOD mice, at 0.5 and 12–16 h after treatment. The plasma active GLP-1 levels were significantly increased at 0.5 h but not 12–16 h after treatment, compared with the control diabetic NOD mice (Fig. 6C). The plasma GLP-1 was  $3.4 \pm 0.5$  pM in control diabetic NOD mice ( $n = 6$ ),  $17.3 \pm 9.3$  pM in NVP-DPP728-treated mice at 0.5 h after treatment ( $n = 6$  vs. control;  $P < 0.01$ ), and  $4.9 \pm 1.9$  pM in NVP-DPP728-treated mice at 12–16 h after treatment ( $n = 16$  vs. control;  $P > 0.05$ ).

### NVP-DPP728-stimulated $\beta$ -cell replication in NOD mice

Because there are few  $\beta$ -cells remaining in diabetic NOD mice after 4 wk, we used prediabetic NOD mice as



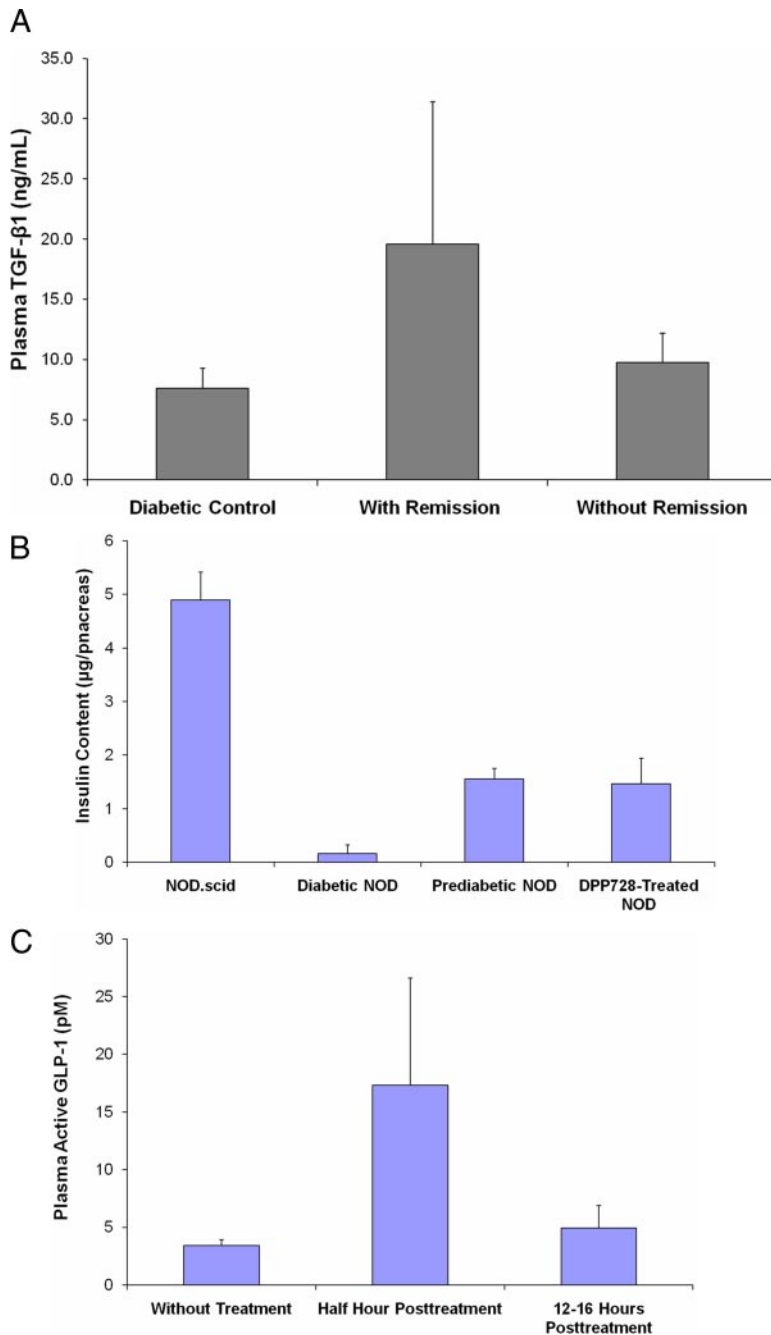

**FIG. 6.** A, TGF-β1 plasma level in NVP-DPP728-treated NOD mice after 4 wk treatment. B, The insulin content of whole pancreas in control NOD.scid mice, diabetic NOD mice, prediabetic NOD mice, and NVP-DPP728-treated diabetic NOD mice with remission. C, Active GLP-1 in plasma of diabetic NOD mice and of NVP-DPP728-treated diabetic NOD mice.

controls and also treated them BrdU daily. Those mice with normoglycemia were killed 4 wk later, and their pancreases were processed for double-immunofluorescent staining for insulin and BrdU. Insulin<sup>+</sup> and BrdU<sup>+</sup> β-cells could be detected in islets of NOD mice (Fig. 7A). Diabetic mice with remission after treated with NVP-DPP728 for 4 wk had significantly more insulin<sup>+</sup> and BrdU<sup>+</sup> β-cells than control NOD mice (Fig. 7B). The mean percentage of insulin<sup>+</sup> and BrdU<sup>+</sup> β-cells was  $2.0 \pm 2.3\%$  in prediabetic NOD mice ( $n = 6$ ). In contrast, diabetic mice treated with

NVP-DPP728 for 4 wk had significantly more replicated β-cells, with a mean percentage of  $24.2 \pm 7.8\%$  insulin<sup>+</sup> and BrdU<sup>+</sup> β-cells in these pancreases ( $n = 10$ ;  $P < 0.01$ ).

### β-Cell replication did not correlate with inflammation in NVP-DPP728-treated NOD mice

To determine whether β-cell replication correlates with inflammation, we analyzed insulinitis and insulin<sup>+</sup> and BrdU<sup>+</sup> β-cells in the pancreases of NVP-DPP728-treated mice with remission ( $n = 10$ ). No significant difference was found between insulinitis score and the percentage of insulin<sup>+</sup> and BrdU<sup>+</sup> β-cells (Fig. 8, A and B). The mean percentage of insulin<sup>+</sup> and BrdU<sup>+</sup> β-cells was  $22.1 \pm 9.1\%$  in islets with insulinitis score 1;  $24.8 \pm 6.5\%$  in islets with insulinitis score 2;  $26.7 \pm 5.5\%$  in islets with insulinitis score 3; and  $21.6 \pm 9.5\%$  in insulinitis score 4 ( $P > 0.05$ ). We also assessed for correlations between the percentage of insulin<sup>+</sup> and BrdU<sup>+</sup> β-cells with an estimate of remaining β-cell area. We divided islets of 10 mice into three different groups: group 1 was less than one third of islet area with insulin<sup>+</sup> β-cells; group 2 was greater than one third but less than two thirds islet area with insulin<sup>+</sup> β-cells; and group 3 was greater than two thirds of islet area with insulin<sup>+</sup> β-cells. No significant correlations were found between the percentage of insulin<sup>+</sup> and BrdU<sup>+</sup> β-cells in islets and remnant β-cell area estimate in NOD mice with normoglycemia (Fig. 8C). The mean percentage of insulin<sup>+</sup> and BrdU<sup>+</sup> β-cells is  $23.5 \pm 9.0\%$  in islets with less than one third insulin<sup>+</sup> β-cell area;

$23.6 \pm 6.3\%$  in islets with greater than one third and less than two thirds insulin<sup>+</sup> β-cell area; and  $24.9 \pm 7.8\%$  insulin<sup>+</sup> β-cell area ( $P > 0.05$ ).

### Discussion

Our results showed that NVP-DPP728 treatment could reverse new-onset diabetes in NOD mice by reducing insulinitis, increasing CD4<sup>+</sup>CD25<sup>+</sup>FoxP3<sup>+</sup> regulatory T



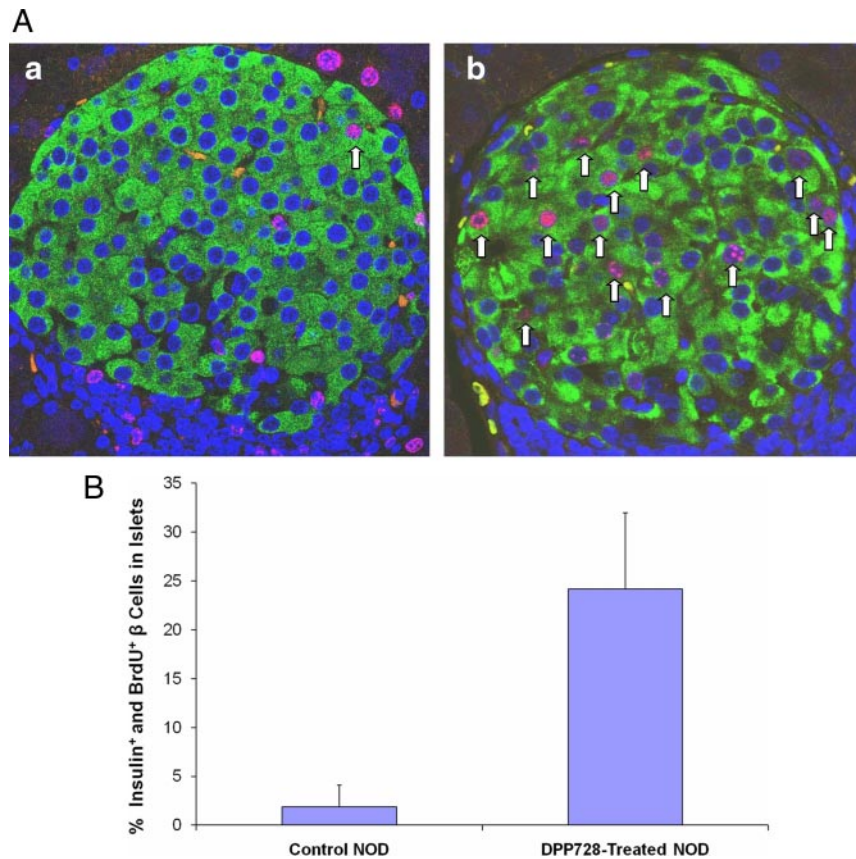

**FIG. 7.** NVP-DPP728 stimulated  $\beta$ -cell replication in NOD mice. A, Double immunofluorescent staining for insulin (green color) and BrdU (red color) in islets of prediabetic NOD mouse given only BrdU daily for 4 wk (a) and in the islet from NOD mice with remission after 4 wk treatment (b). Insulin<sup>+</sup> and BrdU<sup>+</sup>  $\beta$  cells in the islet (arrowheads) of control, prediabetic NOD mouse, and the islet from 4-wk-treated NOD mice can be seen. B, Percentage of insulin<sup>+</sup> and BrdU<sup>+</sup>  $\beta$ -cells in the islets of prediabetic NOD mouse given only BrdU daily for 4 wk and in the islet from NOD mice with remission after 4 wk treatment.

cells, and stimulating  $\beta$ -cell replication. Although an earlier study reported that treating new-onset diabetic NOD mice with a different DPP-IV inhibitor at 10 mg/kg  $\cdot$  d restored normoglycemia in 38% of mice (24), the mechanisms were not addressed. The reason for the lower success rate in their study may be due to the low dose of the DPP-IV inhibitor they used and the treatment regimen. Because of the short half-life of NVP-DPP728 (20), we treated diabetic NOD mice twice daily. It is possible that some of variation in efficacy in our studies is related to the differences in actual drug consumption and the short half-life of NVP-DPP728. Sitagliptin, a Food and Drug Administration-approved DPP-IV inhibitor, could prolong syngeneic islet graft survival in diabetic NOD mice. Sitagliptin pretreatment decreased insulinitis and suppressed the recurrent autoimmunity partially through decreasing the homing of CD4<sup>+</sup> T cells into islets (25). It will be interesting to directly compare the effect of NVP-DPP728 on the immune system with sitagliptin and other DPP-IV inhibitors with a long half-life.

The imbalance between effector T cells and regulatory T cells is a key factor that leads to the onset of diabetes in NOD mice. Our data show that immune regulation plays a critical role in NVP-DPP728-treated NOD mice with normoglycemia. Regulatory T cells can reverse new-onset diabetes in NOD mice (26). In our early study, we found that up-regulating CD4<sup>+</sup>CD25<sup>+</sup>FoxP3<sup>+</sup> regulatory T cells in the pancreatic lymph nodes was responsible for ameliorating autoimmunity in NOD mice (2). One source of regulatory T cells is naturally occurring CD4<sup>+</sup>CD25<sup>+</sup>FoxP3<sup>+</sup> regulatory T cells that developed in the thymus. We found that the frequency of CD4<sup>+</sup>CD25<sup>+</sup>FoxP3<sup>+</sup> regulatory T cells was significantly increased in the thymus of diabetic NOD mice, with remission at 4 and 6 wk after NVP-DPP728 treatment. Whether these regulatory T cells are polyclonal or islet autoantigen specific is unknown.

A significant increase of these cells also was found in the pancreatic lymph nodes but not in neck lymph nodes, spleen, and peripheral blood after 4 wk treatment. In NVP-DPP728-treated NOD mice without remission, a significant increase of regulatory T cells was not detected. After 6 wk treatment, the frequency of CD4<sup>+</sup>CD25<sup>+</sup>FoxP3<sup>+</sup> regulatory T cells was significantly increased in not only the

thymus but also the neck lymph nodes, pancreatic lymph nodes, and spleen. The increase of CD4<sup>+</sup>CD25<sup>+</sup>FoxP3<sup>+</sup> regulatory T cells in the thymus indicates that naturally occurring regulatory T cells were up-regulated by NVP-DPP728 treatment and suggests that these cells migrated to the secondary lymphoid organs. However, it seems more CD4<sup>+</sup>CD25<sup>+</sup>FoxP3<sup>+</sup> regulatory T cells migrated to the draining lymph nodes of the inflammatory site. In these 6-wk-treated mice, the frequency of CD4<sup>+</sup>CD25<sup>+</sup>FoxP3<sup>+</sup> regulatory T cells in pancreatic lymph nodes was significantly higher than in the neck lymph nodes. Although the frequency of CD4<sup>+</sup>CD25<sup>+</sup>FoxP3<sup>+</sup> regulatory T cells was increased in the thymus and secondary lymph organs after 6 wk treatment, a significant decrease of these cells was found in mice that had relapsed after stopping treatment. Our data demonstrate that up-regulation of regulatory T cells is associated with remission. Although NVP-DPP728 treatment could reverse new-onset diabetes in NOD mice, long-term remission was not induced in most NOD mice by short-term

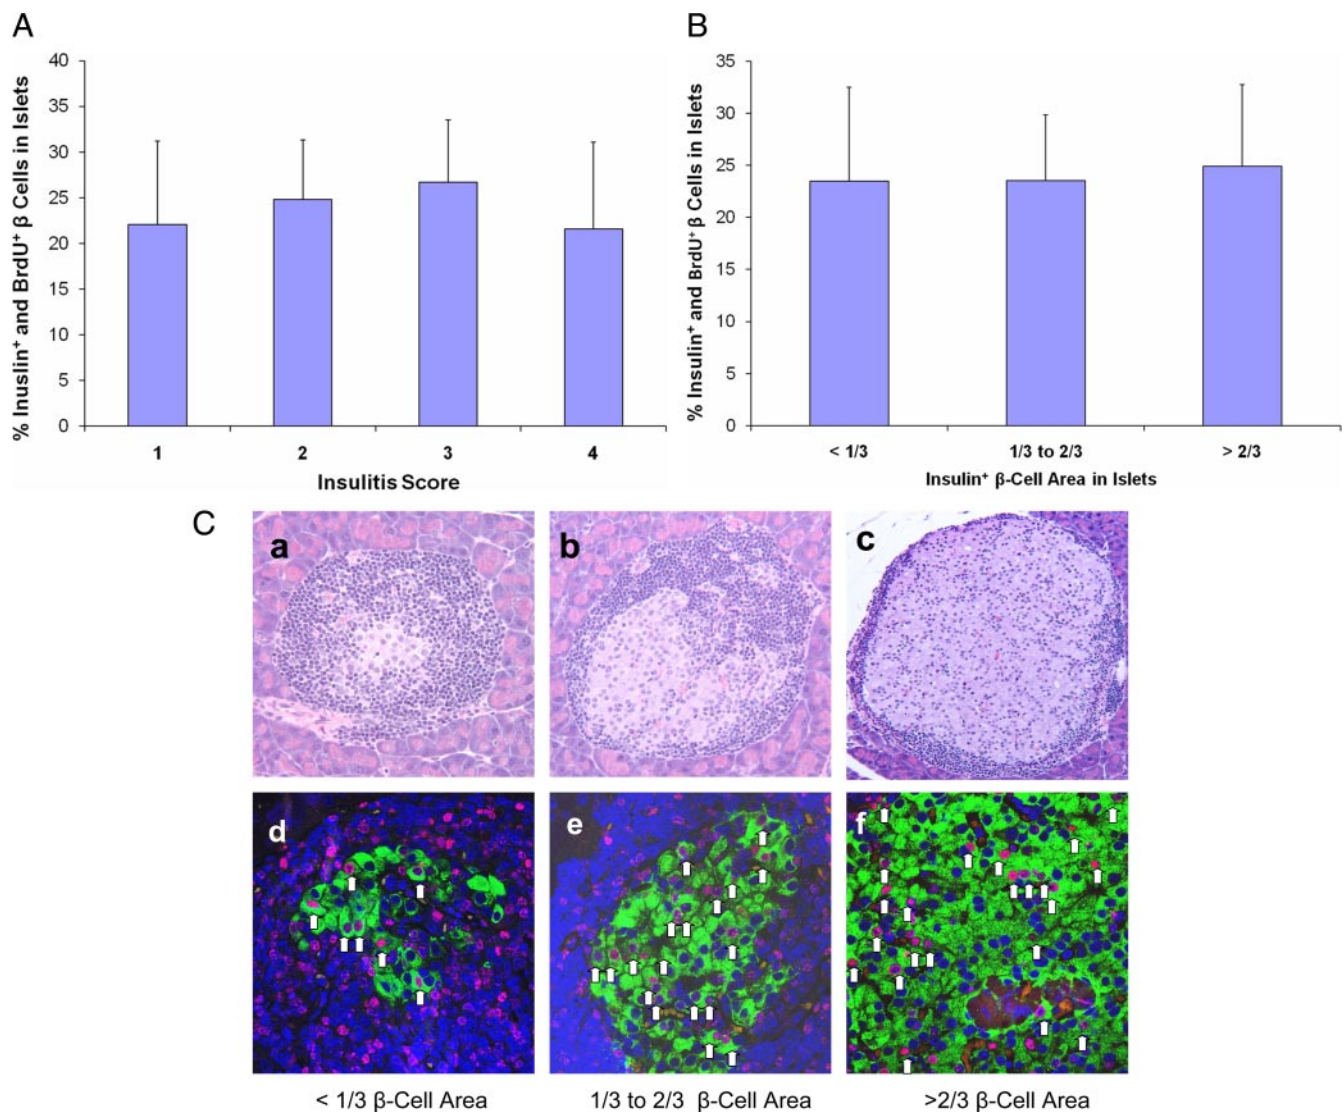

**FIG. 8.**  $\beta$ -Cell replication does not correlate with inflammation in NVP-DPP-728-treated NOD mice. A, Percentage of insulin<sup>+</sup> and BrdU<sup>+</sup>  $\beta$  cells in the islets of different insulinitis score in the pancreas of NOD mice with remission after 4 wk treatment. B, Hematoxylin-and-eosin-stained islets with less than one third  $\beta$ -cell area (a), one third to two thirds  $\beta$ -cell area (b), and greater than two thirds  $\beta$ -cell area (c); and double-immunofluorescent insulin- (green color) and BrdU (red color)-stained islets with less than one third  $\beta$ -cell area (d), one third to two thirds  $\beta$ -cell area (e), and greater than two thirds  $\beta$ -cell area (f) in the pancreas from NOD mice with remission after 4 wk treatment. Insulin<sup>+</sup> and BrdU<sup>+</sup>  $\beta$ -cells in the islet (arrowheads) with different  $\beta$ -cell area from 4-wk-treated NOD mice can be seen. C, Percentage of insulin<sup>+</sup> and BrdU<sup>+</sup>  $\beta$ -cells in the islets with less than one third  $\beta$ -cell area, one third to two thirds  $\beta$ -cell area, and greater than two thirds  $\beta$ -cell area from 4-wk-treated NOD mice with remission.

treatment. Relapse after stopping treatment is linked to reducing regulatory T cells.

Acceleration of diabetes in NOD mice by cyclophosphamide is associated with reducing CD4<sup>+</sup>CD25<sup>+</sup>FoxP3<sup>+</sup> regulatory T cells and can be prevented by transfer of CD4<sup>+</sup>CD25<sup>+</sup> T cells (27). The protection directly correlated with the increase of T regulatory proportions in the pancreas. We found that more CD4<sup>+</sup>CD25<sup>+</sup>FoxP3<sup>+</sup> regulatory T cells and less inflammatory cells in the pancreas of NOD mice with remission suggested that these cells suppress the accumulation and function of effector T cells in the pancreatic environment. T regulatory cells suppress effector T cell migration, accumulation, and proliferation in draining

lymph nodes and inflamed tissues (23). Thus, our findings suggest that up-regulation of naturally occurring CD4<sup>+</sup>CD25<sup>+</sup>FoxP3<sup>+</sup> regulatory T cells in not only the thymus and the pancreatic lymph nodes but also the pancreas is a critical factor in the amelioration of autoimmunity. Because the balance between infiltrated effector T cells and regulatory T cells determines the ultimate outcome of immune responses to islet antigens in the pancreas, further studies are needed to determine how NVP-DPP728 treatment increases naturally occurring CD4<sup>+</sup>CD25<sup>+</sup>FoxP3<sup>+</sup> regulatory T cells and enhances the migration of these regulatory T cells.

T cell progenitors that are generated from hematopoietic stem cells, multiple progenitors, or common lymphoid

progenitors migrate from bone marrow to the thymus to generate mature T cells. This process is regulated by chemokines and its receptors. CD26/DPP-IV cleaves chemokines (5). Inhibition of CD26 promotes hematopoietic stem cell homing and engraftment (28–30). Multiple cell migration-related abnormalities occur in the thymus of NOD mice, and CD4<sup>+</sup> FoxP3<sup>+</sup> regulatory T cells were significantly reduced (31). CD26 deficiency results in altered thymic emigration patterns in CD26-deficient rats. An increase in regulatory T cells and a reduced memory T cells pool also were observed (32). CD26 is an endogenous inhibitor of T-cell motility, and chemokines stimulate cell polarity and migration through abrogation of the CD26-dependent inhibition (33). It suggests that T-cell motility is regulated by a CD26-controlled cell surface cascade. Chemokines and their receptors regulate the migration of regulatory T cells (23, 34–38). Thus, it is possible that NVP-DPP728 treatment modulates chemokines and their receptors in diabetic NOD mice and promotes T-cell progenitors and/or regulatory T cells to migrate to the thymus and then the secondary lymph organs as well as the pancreas. Further studies are needed to investigate the effect of NVP-DPP728 treatment on chemokines and their receptors in NOD mice.

Consistent with the earlier study that showed that DPP-IV inhibitor treatment increased TGF- $\beta$ 1 secretion *in vivo* (9), we found that NVP-DPP827 treatment significantly increased the plasma TGF- $\beta$ 1 levels in diabetic NOD mice with remission. The correlation between CD4<sup>+</sup>CD25<sup>+</sup>Foxp3<sup>+</sup> regulatory T cells and TGF- $\beta$ 1 production is not clear. Although the increase of TGF- $\beta$ 1 production is probably due to the up-regulated regulatory T cells, because CD4<sup>+</sup>CD25<sup>+</sup> regulatory T cells secrete TGF- $\beta$ 1 (12, 15), we could not rule out that TGF- $\beta$ 1, induced by other types of immune cells, promotes expansion of the CD4<sup>+</sup>CD25<sup>+</sup>Foxp3<sup>+</sup> regulatory T cells and converts peripheral CD4<sup>+</sup>CD25<sup>+</sup> T cells into CD4<sup>+</sup>CD25<sup>+</sup>Foxp3<sup>+</sup> regulatory T cells (14).

In these 4-wk-treated NOD mice with remission, we found that insulin<sup>+</sup> and BrdU<sup>+</sup>  $\beta$  cells in islets significantly increased. When BrdU was given 24 h before harvesting pancreases, increased replication of  $\beta$ -cells was not detected in NOD mice treated with anti-CD3 monoclonal antibody (39). A significant increase of replicating  $\beta$ -cells also was not found in NOD mice treated with anti-CD3 monoclonal antibodies and exendin-4, when Ki67 was used as a marker (40). Because the replication rate of  $\beta$ -cells in adults is very slow (41), short-term BrdU labeling or Ki67 staining is not sufficient to label  $\beta$ -cells, and daily BrdU labeling is necessary for successfully labeling replicating  $\beta$ -cells. We found that DPP-728 treatment increased the plasma GLP-1 level in NOD mice. Therefore,

stimulating  $\beta$ -cell replication in NOD mice by DPP-728 treatment probably is due to increasing plasma GLP-1 level.

Using adoptive transfer, a study reported that increased  $\beta$ -cell replication is associated with inflammation to islets in the pancreas (42). We analyzed the correlation of  $\beta$ -cell replication with inflammation in NVP-DPP728-treated mice with remission. Neither significant differences between insulinitis and the percentage of replicated  $\beta$ -cells nor significant differences between the islets with different  $\beta$ -cell area and the percentage of replicated  $\beta$ -cells were found. Our data demonstrate that inflammation is not associated with  $\beta$ -cell replication in NVP-DPP728-treated NOD mice.

In conclusion, our study demonstrates that NVP-DPP728 treatment could reverse new-onset diabetes by increasing naturally occurring CD4<sup>+</sup>CD25<sup>+</sup>FoxP3<sup>+</sup> regulatory T cells and stimulating  $\beta$ -cell replication. Our studies also indicate that targeting CD26/DPP-IV has great clinical potential for reversal of the new-onset of human type 1 diabetes.

## Acknowledgments

Address all correspondence and requests for reprints to: Dr. Zhiguang Guo, Department of Surgery, University of Minnesota, MMC 195, 420 Delaware Street Southeast, Minneapolis, Minnesota 55455. E-mail: zhiguang@tc.umn.edu.

This work was supported by a grant from the Juvenile Diabetes Research Foundation (to Z.G.).

Disclosure Summary: The authors have nothing to disclose.

## References

1. Drucker DJ 2006 The biology of incretin hormones. *Cell Metab* 3:153–165
2. Tian B, Hao J, Zhang Y, Tian L, Yi H, O'Brien TD, Sutherland DE, Hering BJ, Guo Z 2009 Upregulating CD4<sup>+</sup>CD25<sup>+</sup>FOXP3<sup>+</sup> regulatory T cells in pancreatic lymph nodes in diabetic NOD mice by adjuvant immunotherapy. *Transplantation* 87:198–206
3. Baggio LL, Drucker DJ 2006 Therapeutic approaches to preserve islet mass in type 2 diabetes. *Annu Rev Med* 57:265–281
4. Morimoto C, Schlossman SF 1998 The structure and function of CD26 in the T-cell immune response. *Immunol Rev* 161:55–70
5. De Meester I, Korom S, Van Damme J, Scharpé S 1999 CD26, let it cut or cut it down. *Immunol Today* 20:367–375
6. Yan S, Marguet D, Dobers J, Reutter W, Fan H 2003 Deficiency of CD26 results in a change of cytokine and immunoglobulin secretion after stimulation by pokeweed mitogen. *Eur J Immunol* 33:1519–1527
7. Reinhold D, Bank U, Bühling F, Lendeckel U, Faust J, Neubert K, Ansorge S 1997 Inhibitors of dipeptidyl peptidase IV induce secretion of transforming growth factor- $\beta$  1 in PWM-stimulated PBMC and T cells. *Immunology* 91:354–360
8. Reinhold D, Bank U, Bühling F, Täger M, Born I, Faust J, Neubert K, Ansorge S 1997 Inhibitors of dipeptidyl peptidase IV (DP IV,



- CD26) induces secretion of transforming growth factor- $\beta$  1 (TGF- $\beta$ 1) in stimulated mouse splenocytes and thymocytes. *Immunol Lett* 58:29–35
9. Steinbrecher A, Reinhold D, Quigley L, Gado A, Tresser N, Izikson L, Born I, Faust J, Neubert K, Martin R, Ansoerge S, Brocke S 2001 Targeting dipeptidyl peptidase IV (CD26) suppresses autoimmune encephalomyelitis and up-regulates TGF- $\beta$ 1 secretion *in vivo*. *J Immunol* 166:2041–2048
  10. Preller V, Gerber A, Wrenger S, Togni M, Marguet D, Tadjé J, Lendeckel U, Röcken C, Faust J, Neubert K, Schraven B, Martin R, Ansoerge S, Brocke S, Reinhold D 2007 TGF- $\beta$ 1-mediated control of central nervous system inflammation and autoimmunity through the inhibitory receptor CD26. *J Immunol* 178:4632–4640
  11. Belghith M, Bluestone JA, Barriot S, Mégret J, Bach JF, Chatenoud L 2003 TGF- $\beta$ -dependent mechanisms mediate restoration of self-tolerance induced by antibodies to CD3 in overt autoimmune diabetes. *Nat Med* 9:1202–1208
  12. Du W, Wong FS, Li MO, Peng J, Qi H, Flavell RA, Sherwin R, Wen L 2006 TGF- $\beta$  signaling is required for the function of insulin-reactive T regulatory cells. *J Clin Invest* 116:1360–1370
  13. Li MO, Wan YY, Sanjabi S, Robertson AK, Flavell RA 2006 Transforming growth factor- $\beta$  regulation of immune responses. *Annu Rev Immunol* 24:99–146
  14. Peng Y, Laouar Y, Li MO, Green EA, Flavell RA 2004 TGF- $\beta$  regulates *in vivo* expansion of Foxp3-expressing CD4+CD25+ regulatory T cells responsible for protection against diabetes. *Proc Natl Acad Sci USA* 101:4572–4577
  15. Green EA, Gorelik L, McGregor CM, Tran EH, Flavell RA 2003 CD4+CD25+ T regulatory cells control anti-islet CD8+ T cells through TGF- $\beta$ -TGF- $\beta$  receptor interactions in type 1 diabetes. *Proc Natl Acad Sci USA* 100:10878–10883
  16. Sakaguchi S, Ono M, Setoguchi R, Yagi H, Hori S, Fehervari Z, Shimizu J, Takahashi T, Nomura T 2006 Foxp3+ CD25+ CD4+ natural regulatory T cells in dominant self-tolerance and autoimmune disease. *Immunol Rev* 212:8–27
  17. Hughes TE, Mone MD, Russell ME, Weldon SC, Villhauer EB 1999 NVP-DPP728 (1-[[[2-[(5-cyanopyridin-2-yl)amino]ethyl]amino]acetyl]-2-cyano-(S)-pyrrolidine], a slow-binding inhibitor of dipeptidyl peptidase IV. *Biochemistry* 38:11597–11603
  18. Balkan B, Kwasnik L, Miserendino R, Holst JJ, Li X 1999 Inhibition of dipeptidyl peptidase IV with NVP-DPP728 increases plasma GLP-1 (7–36 amide) concentrations and improves oral glucose tolerance in obese Zucker rats. *Diabetologia* 42:1324–1331
  19. Reimer MK, Holst JJ, Ahrén B 2002 Long-term inhibition of dipeptidyl peptidase IV improves glucose tolerance and preserves islet function in mice. *Eur J Endocrinol* 146:717–727
  20. Villhauer EB, Brinkman JA, Naderi GB, Dunning BE, Mangold BL, Mone MD, Russell ME, Weldon SC, Hughes TE 2002 1-[2-[(5-cyanopyridin-2-yl)amino]ethylamino]acetyl-2-(S)-pyrrolidinecarbonitrile: a potent, selective, and orally bioavailable dipeptidyl peptidase IV inhibitor with antihyperglycemic properties. *J Med Chem* 45:2362–2365
  21. Mitani H, Takimoto M, Hughes TE, Kimura M 2002 Dipeptidyl peptidase IV inhibition improves impaired glucose tolerance in high-fat diet-fed rats: study using a Fischer 344 rat substrain deficient in its enzyme activity. *Jpn J Pharmacol* 88:442–450
  22. Mitani H, Takimoto M, Kimura M 2002 Dipeptidyl peptidase IV inhibitor NVP-DPP728 ameliorates early insulin response and glucose tolerance in aged rats but not in aged Fischer 344 rats lacking its enzyme activity. *Jpn J Pharmacol* 88:451–458
  23. Zhang N, Schröppel B, Lal G, Jakubczik C, Mao X, Chen D, Yin N, Jessberger R, Ochando JC, Ding Y, Bromberg JS 2009 Regulatory T cells sequentially migrate from inflamed tissues to draining lymph nodes to suppress the alloimmune response. *Immunity* 30:458–469
  24. Suarez-Pinzon WL, Cembrowski GS, Rabinovitch A 2009 Combination therapy with a dipeptidyl peptidase-4 inhibitor and a proton pump inhibitor restores normoglycaemia in non-obese diabetic mice. *Diabetologia* 52:1680–1682
  25. Kim SJ, Nian C, Doudet DJ, McIntosh CH 2009 Dipeptidyl peptidase IV inhibition with MK0431 improves islet graft survival in diabetic NOD mice partially via T-cell modulation. *Diabetes* 58:641–651
  26. Tang Q, Henriksen KJ, Bi M, Finger EB, Szot G, Ye J, Masteller EL, McDevitt H, Bonyhadi M, Bluestone JA 2004 *In vitro*-expanded antigen-specific regulatory T cells suppress autoimmune diabetes. *J Exp Med* 199:1455–1465
  27. Brode S, Raine T, Zaccane P, Cooke A 2006 Cyclophosphamide-induced type-1 diabetes in the NOD mouse is associated with a reduction of CD4+CD25+Foxp3+ regulatory T cells. *J Immunol* 177:6603–6612
  28. Christopherson 2nd KW, Hangoc G, Broxmeyer HE 2002 Cell surface peptidase CD26/dipeptidylpeptidase IV regulates CXCL12/stromal cell-derived factor-1 $\alpha$ -mediated chemotaxis of human cord blood CD34+ progenitor cells. *J Immunol* 169:7000–7008
  29. Christopherson 2nd KW, Hangoc G, Mantel CR, Broxmeyer HE 2004 Modulation of hematopoietic stem cell homing and engraftment by CD26. *Science* 305:1000–1003
  30. Peranteau WH, Endo M, Adibe OO, Merchant A, Zoltick PW, Flake AW 2006 CD26 inhibition enhances allogeneic donor-cell homing and engraftment after *in utero* hematopoietic-cell transplantation. *Blood* 108:4268–4274
  31. Mendes-da-Cruz DA, Smaniotto S, Keller AC, Dardenne M, Savino W 2008 Multivectorial abnormal cell migration in the NOD mouse thymus. *J Immunol* 180:4639–4647
  32. Klemann C, Schade J, Pabst R, Leitner S, Stiller J, von Hörsten S, Stephan M 2009 CD26/dipeptidyl peptidase 4-deficiency alters thymic emigration patterns and leukocyte subsets in F344-rats age-dependently. *Clin Exp Immunol* 155:357–365
  33. Liu Z, Christensson M, Forslöw A, De Meester, I, Sundqvist KG 2009 A CD26-controlled cell surface cascade for regulation of T cell motility and chemokine signals. *J Immunol* 183:3616–3624
  34. Zou L, Barnett B, Safah H, Larussa VF, Evdemon-Hogan M, Mottram P, Wei S, David O, Curriel TJ, Zou W 2004 Bone marrow is a reservoir for CD4+CD25+ regulatory T cells that traffic through CXCL12/CXCR4 signals. *Cancer Res* 64:8451–8455
  35. Lee JH, Kang SG, Kim CH 2007 FoxP3+ T cells undergo conventional first switch to lymphoid tissue homing receptors in thymus but accelerated second switch to nonlymphoid tissue homing receptors in secondary lymphoid tissues. *J Immunol* 178:301–311
  36. Schneider MA, Meingassner JG, Lipp M, Moore HD, Rot A 2007 CCR7 is required for the *in vivo* function of CD4+ CD25+ regulatory T cells. *J Exp Med* 204:735–745
  37. Yamazaki T, Yang XO, Chung Y, Fukunaga A, Nurieva R, Pappu B, Martin-Orozco N, Kang HS, Ma L, Panopoulos AD, Craig S, Watowich SS, Jetten AM, Tian Q, Dong C 2008 CCR6 regulates the migration of inflammatory and regulatory T cells. *J Immunol* 181:8391–8401
  38. Meiron M, Zohar Y, Anunu R, Wildbaum G, Karin N 2008 CXCL12 (SDF-1 $\alpha$ ) suppresses ongoing experimental autoimmune encephalomyelitis by selecting antigen-specific regulatory T cells. *J Exp Med* 205:2643–2655
  39. Phillips JM, O'Reilly L, Bland C, Foulis AK, Cooke A 2007 Patients with chronic pancreatitis have islet progenitor cells in their ducts, but reversal of overt diabetes in NOD mice by anti-CD3 shows no evidence for islet regeneration. *Diabetes* 56:634–640
  40. Sherry NA, Chen W, Kushner JA, Glandt M, Tang Q, Tsai S, Santamaria P, Bluestone JA, Brilantes AM, Herold KC 2007 Exendin-4 improves reversal of diabetes in NOD mice treated with anti-CD3 monoclonal antibody by enhancing recovery of  $\beta$ -cells. *Endocrinology* 148:5136–5144
  41. Bonner-Weir S 2000 Life and death of the pancreatic  $\beta$  cells. *Trends Endocrinol Metab* 11:375–378
  42. Sherry NA, Kushner JA, Glandt M, Kitamura T, Brilantes AM, Herold KC 2006 Effects of autoimmunity and immune therapy on  $\beta$ -cell turnover in type 1 diabetes. *Diabetes* 55:3238–3245
